# Supplementary material for: Secondary Metabolism Rearrangements in Linum usitatissimum L. after Biostimulation of Roots with COS Oligosaccharides from Fungal Cell Wall
Source: MDPI journal article supplement (doi:10.3390/molecules27072372), 2022-04-06
Supplement: s1 [file s1]

## SUPPLEMENTARY MATERIALS

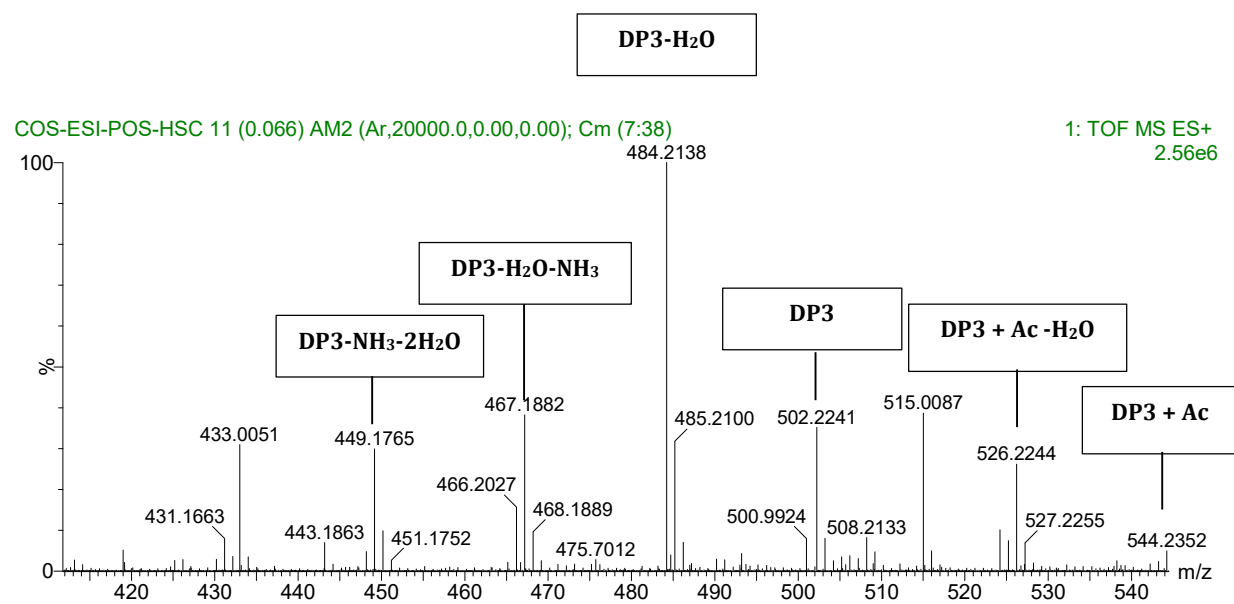

**Figure S1.** Electrospray-ionization high resolution mass spectrometry (ESI-HRMS) analysis of selected DP3 of chitosan oligosaccharides obtained from fungal chitosan by acetic acid hydrolyzed method using autoclaving-cooling process (10 cycles, 30 min at 121 °C and 15 min cooling).

**Table S1:** Mass spectrometric data for COS oligomers produced during the acid hydrolysis process.

|                       | Elemental composition                                            | Experimental m/z | Theoretical m/z | Error (ppm) | Error (mDa) |
|-----------------------|------------------------------------------------------------------|------------------|-----------------|-------------|-------------|
| DP1-H <sub>2</sub> O  | C <sub>6</sub> H <sub>11</sub> O <sub>4</sub> N                  | 162.0766         | 162.0767        | 0.4         | 0.1         |
| DP2-H <sub>2</sub> O  | C <sub>12</sub> H <sub>22</sub> O <sub>8</sub> N <sub>2</sub>    | 323.1454         | 323.1453        | -0.4        | -0.1        |
| DP3-H <sub>2</sub> O  | C <sub>18</sub> H <sub>33</sub> O <sub>12</sub> N <sub>3</sub>   | 484.2143         | 484.2138        | -0.9        | -0.5        |
| DP4-H <sub>2</sub> O  | C <sub>24</sub> H <sub>44</sub> O <sub>16</sub> N <sub>4</sub>   | 645.2831         | 645.2837        | 1.0         | 0.6         |
| DP5-H <sub>2</sub> O  | C <sub>30</sub> H <sub>55</sub> O <sub>20</sub> N <sub>5</sub>   | 806.3519         | 806.3519        | 0.0         | 0.0         |
| DP6-H <sub>2</sub> O  | C <sub>36</sub> H <sub>66</sub> O <sub>24</sub> N <sub>6</sub>   | 967.4207         | 967.4202        | -0.5        | -0.5        |
| DP7- H <sub>2</sub> O | C <sub>42</sub> H <sub>77</sub> O <sub>28</sub> N <sub>7</sub>   | 1128.4895        | 1128.4868       | -2.4        | -2.7        |
| DP8-H <sub>2</sub> O  | C <sub>48</sub> H <sub>88</sub> O <sub>32</sub> N <sub>8</sub>   | 1289.5583        | 1289.5535       | -3.7        | -4.8        |
| DP9-H <sub>2</sub> O  | C <sub>54</sub> H <sub>99</sub> O <sub>36</sub> N <sub>9</sub>   | 1450.6271        | 1450.621        | -4.2        | -6.1        |
| DP10-H <sub>2</sub> O | C <sub>60</sub> H <sub>110</sub> O <sub>40</sub> N <sub>10</sub> | 1611.6959        | 1611.6892       | -4.2        | -6.7        |

**Table S2:** <sup>1</sup>H-NMR and <sup>13</sup>C-NMR spectral data for a solution of chitosan oligosaccharides solubilized in deuterium oxide (10 mg/mL).

| Chemical shifts (δ) relative to TMSP * |      |                 |       |
|----------------------------------------|------|-----------------|-------|
| H <sub>1</sub>                         | 4.69 | C <sub>1</sub>  | 102.6 |
| H <sub>2</sub>                         | 2.98 | C <sub>2</sub>  | 59.0  |
| H <sub>3</sub>                         | 3.73 | C <sub>3</sub>  | 74.6  |
| H <sub>4</sub>                         | 3.82 | C <sub>4</sub>  | 79.8  |
| H <sub>5</sub>                         | 3.68 | C <sub>5</sub>  | 77.9  |
| H <sub>6</sub>                         | 3.79 | C <sub>6</sub>  | 62.9  |
| H <sub>6'</sub>                        | 3.95 | -               | -     |
| C=O                                    | -    | C=O             | 177.4 |
| CH <sub>3</sub>                        | 2.07 | CH <sub>3</sub> | 24.9  |

\* 3-(trimethylsilyl)-propionic acid D<sub>4</sub>, sodium salt

**Table S3:** Identification of phenolics compounds in roots and shoots of flax seedlings by UPLC-MS/MS.

| N | Family                                  | Compounds                           | Part used     | RT (min) | CCS<br>(Å <sup>2</sup> ) | [M-H] <sup>-</sup><br>precursor<br>ion (m/z) | MS <sup>2</sup><br>fragment<br>ions (m/z) | m/z<br>(Expected) | Error (mDa) | Error<br>(ppm) | Elemental<br>Composition                          | Collision<br>energy<br>(eV) | References |
|---|-----------------------------------------|-------------------------------------|---------------|----------|--------------------------|----------------------------------------------|-------------------------------------------|-------------------|-------------|----------------|---------------------------------------------------|-----------------------------|------------|
| 1 | Cyanogenic<br>glycoside                 | Linamarin                           | shoots, roots | 0,54     | 165                      | 292,1045                                     |                                           | 292,1038          | 0,7         | 2,2            | C <sub>11</sub> H <sub>18</sub> O <sub>8</sub> N* | 16                          | [I, II]    |
|   |                                         |                                     |               |          |                          |                                              | 161,0454                                  | 161,0455          | -0,2        | -1,2           | C <sub>6</sub> H <sub>9</sub> O <sub>5</sub>      |                             |            |
|   |                                         |                                     |               |          |                          |                                              | 159,0304                                  | 159,0299          | 0,5         | 3,4            | C <sub>6</sub> H <sub>7</sub> O <sub>5</sub>      |                             |            |
|   |                                         |                                     |               |          |                          |                                              | 113,0240                                  | 113,0244          | -0,4        | -3,6           | C <sub>5</sub> H <sub>5</sub> O <sub>3</sub>      |                             |            |
|   |                                         |                                     |               |          |                          |                                              | 101,0240                                  | 101,0244          | -0,4        | -4,4           | C <sub>4</sub> H <sub>5</sub> O <sub>3</sub>      |                             |            |
|   |                                         |                                     |               |          |                          |                                              | 95,0133                                   | 95,0139           | -0,5        | -5,4           | C <sub>5</sub> H <sub>3</sub> O <sub>2</sub>      |                             |            |
|   |                                         |                                     |               |          |                          |                                              | 89,0239                                   | 89,0244           | -0,5        | -6,0           | C <sub>3</sub> H <sub>5</sub> O <sub>3</sub>      |                             |            |
|   |                                         |                                     |               |          |                          |                                              | 85,0289                                   | 85,0295           | -0,6        | -6,7           | C <sub>4</sub> H <sub>5</sub> O <sub>2</sub>      |                             |            |
|   |                                         |                                     |               |          |                          |                                              | 83,0137                                   | 83,0139           | -0,2        | -2,0           | C <sub>4</sub> H <sub>5</sub> O <sub>2</sub>      |                             |            |
|   |                                         |                                     |               |          |                          |                                              | 73,0289                                   | 73,0295           | -0,6        | -8,5           | C <sub>3</sub> H <sub>5</sub> O <sub>2</sub>      |                             |            |
|   |                                         |                                     |               |          |                          |                                              | 71,0133                                   | 71,0139           | -0,5        | -7,4           | C <sub>3</sub> H <sub>3</sub> O <sub>2</sub>      |                             |            |
| 2 | Cyanogenic<br>glycoside                 | Lotaustralin                        | shoots, roots | 0,81     | 169                      | 306,1204                                     |                                           | 306,1194          | 0,9         | 3,1            | C <sub>12</sub> H <sub>20</sub> O <sub>8</sub> N* | 17                          | [I, II]    |
|   |                                         |                                     |               |          |                          |                                              | 161,0456                                  | 161,0455          | 0,0         | 0,0            | C <sub>6</sub> H <sub>9</sub> O <sub>5</sub>      |                             |            |
|   |                                         |                                     |               |          |                          |                                              | 159,0302                                  | 159,0299          | 0,3         | 1,8            | C <sub>6</sub> H <sub>7</sub> O <sub>5</sub>      |                             |            |
|   |                                         |                                     |               |          |                          |                                              | 113,0242                                  | 113,0244          | -0,2        | -1,7           | C <sub>5</sub> H <sub>5</sub> O <sub>3</sub>      |                             |            |
|   |                                         |                                     |               |          |                          |                                              | 101,0243                                  | 101,0244          | -0,2        | -1,6           | C <sub>4</sub> H <sub>5</sub> O <sub>3</sub>      |                             |            |
|   |                                         |                                     |               |          |                          |                                              | 99,0088                                   | 99,0088           | 0,0         | 0,2            | C <sub>4</sub> H <sub>3</sub> O <sub>3</sub>      |                             |            |
|   |                                         |                                     |               |          |                          |                                              | 95,0139                                   | 95,0139           | 0,0         | 0,0            | C <sub>5</sub> H <sub>3</sub> O <sub>2</sub>      |                             |            |
|   |                                         |                                     |               |          |                          |                                              | 89,0241                                   | 89,0244           | -0,3        | -3,1           | C <sub>3</sub> H <sub>5</sub> O <sub>3</sub>      |                             |            |
|   |                                         |                                     |               |          |                          |                                              | 85,0293                                   | 85,0295           | -0,2        | -2,2           | C <sub>4</sub> H <sub>5</sub> O <sub>2</sub>      |                             |            |
|   |                                         |                                     |               |          |                          |                                              | 73,0292                                   | 73,0295           | -0,3        | -3,9           | C <sub>3</sub> H <sub>5</sub> O <sub>2</sub>      |                             |            |
| 6 | Flavonoids<br>(luteolin<br>derivatives) | <i>Carlinoside</i><br><i>isomer</i> | shoots        | 2,44     | 230                      | 579,1373                                     |                                           | 579,1355          | 1,8         | 3,0            | C <sub>26</sub> H <sub>27</sub> O <sub>15</sub>   | 32                          | [III]      |
|   |                                         |                                     |               |          |                          |                                              | 489,1059                                  | 489,1039          | 2,0         | 4,1            | C <sub>23</sub> H <sub>21</sub> O <sub>12</sub>   |                             |            |
|   |                                         |                                     |               |          |                          |                                              | 471,0947                                  | 471,0933          | 1,4         | 3,0            | C <sub>23</sub> H <sub>19</sub> O <sub>11</sub>   |                             |            |

|    |                                         |                                         |        |      |     |          |          |          |          |                                                 |                                                   |    |                    |                                                 |
|----|-----------------------------------------|-----------------------------------------|--------|------|-----|----------|----------|----------|----------|-------------------------------------------------|---------------------------------------------------|----|--------------------|-------------------------------------------------|
|    |                                         |                                         |        |      |     | 459,0948 | 459,0933 | 1,5      | 3,3      | C <sub>22</sub> H <sub>19</sub> O <sub>11</sub> |                                                   |    |                    |                                                 |
|    |                                         |                                         |        |      |     | 441,0835 | 441,0827 | 0,8      | 1,9      | C <sub>22</sub> H <sub>17</sub> O <sub>10</sub> |                                                   |    |                    |                                                 |
|    |                                         |                                         |        |      |     | 429,0845 | 429,0827 | 1,7      | 4,0      | C <sub>21</sub> H <sub>17</sub> O <sub>10</sub> |                                                   |    |                    |                                                 |
|    |                                         |                                         |        |      |     | 411,0741 | 411,0722 | 1,9      | 4,7      | C <sub>21</sub> H <sub>15</sub> O <sub>9</sub>  |                                                   |    |                    |                                                 |
|    |                                         |                                         |        |      |     | 399,0729 | 399,0722 | 0,7      | 1,7      | C <sub>20</sub> H <sub>15</sub> O <sub>9</sub>  |                                                   |    |                    |                                                 |
|    |                                         |                                         |        |      |     | 369,0630 | 369,0616 | 1,4      | 3,7      | C <sub>19</sub> H <sub>13</sub> O <sub>8</sub>  |                                                   |    |                    |                                                 |
|    |                                         |                                         |        |      |     | 339,0514 | 339,0510 | 0,4      | 1,2      | C <sub>18</sub> H <sub>11</sub> O <sub>7</sub>  |                                                   |    |                    |                                                 |
| 13 | Flavonoids<br>(apigenin<br>derivatives) | <i>Schaftoside<br/>isomer</i>           | shoots | 2,66 | 230 | 563,1426 |          | 563,1406 | 2,0      | 3,5                                             | C <sub>26</sub> H <sub>27</sub> O <sub>14</sub>   | 33 | [III]              |                                                 |
|    |                                         |                                         |        |      |     |          |          | 503,1219 | 503,1195 | 2,4                                             | 4,8                                               |    |                    | C <sub>24</sub> H <sub>23</sub> O <sub>12</sub> |
|    |                                         |                                         |        |      |     |          |          | 473,1113 | 473,1089 | 2,3                                             | 4,9                                               |    |                    | C <sub>23</sub> H <sub>21</sub> O <sub>11</sub> |
|    |                                         |                                         |        |      |     |          |          | 443,1002 | 443,0984 | 1,9                                             | 4,2                                               |    |                    | C <sub>22</sub> H <sub>19</sub> O <sub>10</sub> |
|    |                                         |                                         |        |      |     |          |          | 425,0887 | 425,0878 | 0,9                                             | 2,0                                               |    |                    | C <sub>22</sub> H <sub>17</sub> O <sub>9</sub>  |
|    |                                         |                                         |        |      |     |          |          | 413,0894 | 413,0878 | 1,6                                             | 3,8                                               |    |                    | C <sub>21</sub> H <sub>17</sub> O <sub>9</sub>  |
|    |                                         |                                         |        |      |     |          |          | 383,0786 | 383,0772 | 1,4                                             | 3,7                                               |    |                    | C <sub>20</sub> H <sub>15</sub> O <sub>8</sub>  |
|    |                                         |                                         |        |      |     |          |          | 353,0672 | 353,0667 | 0,5                                             | 1,4                                               |    |                    | C <sub>19</sub> H <sub>13</sub> O <sub>7</sub>  |
| 16 | Hydroxycinnamic<br>acids                | 3-O-<br>caffeoylquinic<br>acid          | shoots | 1,03 | 174 | 353,0885 |          | 353,0878 | 0,7      | 2,0                                             | C <sub>16</sub> H <sub>17</sub> O <sub>9</sub>    | 13 | [IV, V]            |                                                 |
|    |                                         |                                         |        |      |     |          |          | 339,0514 | 339,0510 | 0,4                                             | 1,2                                               |    |                    | C <sub>18</sub> H <sub>11</sub> O <sub>7</sub>  |
|    |                                         |                                         |        |      |     |          |          | 191,0561 | 191,0561 | 0,0                                             | -0,2                                              |    |                    | C <sub>7</sub> H <sub>11</sub> O <sub>6</sub>   |
| 17 | Hydroxycinnamic<br>acids                | <i>Caffeoylquinic<br/>acid isomer</i>   | shoots | 1,60 | 177 | 353,0887 |          | 353,0878 | 0,9      | 2,6                                             | C <sub>16</sub> H <sub>17</sub> O <sub>9</sub>    | 13 | [IV, V]            |                                                 |
|    |                                         |                                         |        |      |     |          |          | 191,0561 | 191,0561 | 0,0                                             | -0,1                                              |    |                    | C <sub>7</sub> H <sub>11</sub> O <sub>6</sub>   |
| 18 | Hydroxycinnamic<br>acids                | <i>Caffeoylquinic<br/>acid hexoside</i> | shoots | 0,62 | 231 | 515,1423 |          | 515,1406 | 1,6      | 3,2                                             | C <sub>22</sub> H <sub>27</sub> O <sub>14</sub>   | 25 | [IV, V]            |                                                 |
|    |                                         |                                         |        |      |     |          |          | 353,0891 | 353,0878 | 1,3                                             | 3,6                                               |    |                    | C <sub>16</sub> H <sub>17</sub> O <sub>9</sub>  |
|    |                                         |                                         |        |      |     |          |          | 191,0562 | 191,0561 | 0,1                                             | 0,6                                               |    |                    | C <sub>7</sub> H <sub>11</sub> O <sub>6</sub>   |
| 19 | Hydroxycinnamic<br>acids                | Caftaric acid                           | roots  | 0,68 | 172 | 333,0224 |          | 333,0252 | -2,8     | -8,4                                            | C <sub>15</sub> H <sub>9</sub> O <sub>9</sub>     | 14 | [V]                |                                                 |
| 20 | Hydroxycinnamic<br>acids                | Icariside F2                            | roots  | 1,78 | 204 | 447,1520 |          | 447,1508 | 1,2      | 2,8                                             | C <sub>19</sub> H <sub>27</sub> O <sub>12</sub> * | 10 | [VI, VII,<br>VIII] |                                                 |
|    |                                         |                                         |        |      |     |          |          | 402,1498 | 402,1531 | -3,4                                            | -8,3                                              |    |                    | C <sub>18</sub> H <sub>26</sub> O <sub>10</sub> |
|    |                                         |                                         |        |      |     |          |          | 401,1463 | 401,1453 | 0,9                                             | 2,3                                               |    |                    | C <sub>18</sub> H <sub>25</sub> O <sub>10</sub> |
| 21 | Hydroxycinnamic                         | Chicoric acid                           | roots  | 2,77 | 204 | 473,0739 |          | 473,0726 | 1,4      | 2,9                                             | C <sub>22</sub> H <sub>17</sub> O <sub>12</sub>   | 13 | [V]                |                                                 |

|       |          |                                        |       |      |                                              |          |          |          |                                                |                                                   |                                                |                        |                        |
|-------|----------|----------------------------------------|-------|------|----------------------------------------------|----------|----------|----------|------------------------------------------------|---------------------------------------------------|------------------------------------------------|------------------------|------------------------|
| acids |          |                                        |       |      | 311,0414                                     | 311,0409 | 0,5      | 1,7      | C <sub>13</sub> H <sub>11</sub> O <sub>9</sub> |                                                   |                                                |                        |                        |
|       |          |                                        |       |      | 293,0303                                     | 293,0303 | 0,0      | 0,1      | C <sub>13</sub> H <sub>9</sub> O <sub>8</sub>  |                                                   |                                                |                        |                        |
|       |          |                                        |       |      | 179,0347                                     | 179,0350 | -0,2     | -1,4     | C <sub>9</sub> H <sub>7</sub> O <sub>4</sub>   |                                                   |                                                |                        |                        |
|       |          |                                        |       |      | 149,0088                                     | 149,0092 | -0,4     | -2,6     | C <sub>4</sub> H <sub>5</sub> O <sub>6</sub>   |                                                   |                                                |                        |                        |
| 26    | Lignans  | (-)-Olivil 4'-O-beta-D-glucopyranoside | roots | 2,57 | 231                                          | 583,2041 | 583,2032 | 0,8      | 1,4                                            | C <sub>27</sub> H <sub>35</sub> O <sub>14</sub> * | 12                                             | [IX, X, XI, XII, XIII] |                        |
|       |          |                                        |       |      |                                              | 538,2019 | 538,2056 | -3,7     | -6,9                                           | C <sub>26</sub> H <sub>34</sub> O <sub>12</sub>   |                                                |                        |                        |
|       |          |                                        |       |      |                                              | 537,1984 | 537,1978 | 0,7      | 1,3                                            | C <sub>26</sub> H <sub>33</sub> O <sub>12</sub>   |                                                |                        |                        |
|       |          |                                        |       |      |                                              | 375,1453 | 375,1449 | 0,3      | 0,9                                            | C <sub>20</sub> H <sub>23</sub> O <sub>7</sub>    |                                                |                        |                        |
| 27    | Lignans  | Olivil isomer 1                        | roots | 1,64 | 238                                          | 583,2052 | 583,2032 | 2,0      | 3,4                                            | C <sub>27</sub> H <sub>35</sub> O <sub>14</sub>   | 19                                             | [IX, X, XI, XII, XIII] |                        |
|       |          |                                        |       |      |                                              | 507,1873 | 507,1872 | 0,1      | 0,3                                            | C <sub>25</sub> H <sub>31</sub> O <sub>11</sub>   |                                                |                        |                        |
|       |          |                                        |       |      |                                              | 375,1459 | 375,1449 | 0,9      | 2,5                                            | C <sub>20</sub> H <sub>23</sub> O <sub>7</sub>    |                                                |                        |                        |
|       |          |                                        |       |      |                                              | 357,1348 | 357,1344 | 0,4      | 1,3                                            | C <sub>20</sub> H <sub>21</sub> O <sub>6</sub>    |                                                |                        |                        |
|       |          |                                        |       |      |                                              | 345,1347 | 345,1344 | 0,3      | 0,9                                            | C <sub>19</sub> H <sub>21</sub> O <sub>6</sub>    |                                                |                        |                        |
|       |          |                                        |       |      |                                              | 315,1240 | 315,1238 | 0,2      | 0,8                                            | C <sub>18</sub> H <sub>19</sub> O <sub>5</sub>    |                                                |                        |                        |
| 28    | Lignans  | Olivil isomer 2                        | roots | 2,63 |                                              |          | 297,1139 | 297,1132 | 0,7                                            | 2,2                                               | C <sub>18</sub> H <sub>17</sub> O <sub>4</sub> | 17                     | [IX, X, XI, XII, XIII] |
|       |          |                                        |       |      | 223                                          | 583,2042 | 583,2032 | 1,0      | 1,6                                            | C <sub>27</sub> H <sub>35</sub> O <sub>14</sub>   |                                                |                        |                        |
|       |          |                                        |       |      |                                              | 537,1998 | 537,1978 | 2,0      | 3,7                                            | C <sub>26</sub> H <sub>33</sub> O <sub>12</sub>   |                                                |                        |                        |
|       |          |                                        |       |      |                                              | 375,1460 | 375,1449 | 1,0      | 2,7                                            | C <sub>20</sub> H <sub>23</sub> O <sub>7</sub>    |                                                |                        |                        |
|       |          |                                        |       |      |                                              | 327,1248 | 327,1238 | 1,0      | 3,1                                            | C <sub>19</sub> H <sub>19</sub> O <sub>5</sub>    |                                                |                        |                        |
| 29    | Lignans  | Olivil isomer 3                        | roots | 2,90 |                                              |          | 195,0663 | 195,0663 | 0,0                                            | 0,0                                               | C <sub>10</sub> H <sub>11</sub> O <sub>4</sub> | 17                     | [IX, X, XI, XII, XIII] |
|       |          |                                        |       |      | 222                                          | 583,2050 | 583,2032 | 1,8      | 3,1                                            | C <sub>27</sub> H <sub>35</sub> O <sub>14</sub>   |                                                |                        |                        |
|       |          |                                        |       |      |                                              | 537,1990 | 537,1978 | 1,2      | 2,3                                            | C <sub>26</sub> H <sub>33</sub> O <sub>12</sub>   |                                                |                        |                        |
|       |          |                                        |       |      |                                              | 375,1457 | 375,1449 | 0,8      | 2,1                                            | C <sub>20</sub> H <sub>23</sub> O <sub>7</sub>    |                                                |                        |                        |
|       |          |                                        |       |      |                                              | 327,1244 | 327,1238 | 0,6      | 1,7                                            | C <sub>19</sub> H <sub>19</sub> O <sub>5</sub>    |                                                |                        |                        |
|       |          |                                        |       |      |                                              | 195,0661 | 195,0663 | -0,2     | -1,1                                           | C <sub>10</sub> H <sub>11</sub> O <sub>4</sub>    |                                                |                        |                        |
|       |          |                                        |       |      |                                              | 179,0713 | 179,0714 | -0,1     | -0,4                                           | C <sub>10</sub> H <sub>11</sub> O <sub>3</sub>    |                                                |                        |                        |
|       | 165,0555 | 165,0557                               | -0,2  | -1,1 | C <sub>9</sub> H <sub>9</sub> O <sub>3</sub> |          |          |          |                                                |                                                   |                                                |                        |                        |

|    |         |                        |       |      |     |          |          |      |      |                                                 |    |           |
|----|---------|------------------------|-------|------|-----|----------|----------|------|------|-------------------------------------------------|----|-----------|
| 30 | Lignans | <i>Olivil isomer 4</i> | roots | 3,29 | 237 | 583,2019 | 583,2032 | -1,3 | -2,3 | C <sub>27</sub> H <sub>35</sub> O <sub>14</sub> | 17 | [XIV, XV] |
| 32 | Lignans | <i>SMG isomer</i>      | roots | 3,90 | 217 | 523,2191 | 523,2185 | 0,6  | 1,1  | C <sub>26</sub> H <sub>35</sub> O <sub>11</sub> | 15 | [XIV,XV]  |
|    |         |                        |       |      |     | 361,1662 | 361,1657 | 0,5  | 1,4  | C <sub>20</sub> H <sub>25</sub> O <sub>6</sub>  |    |           |

\* [M+HCOO]- adduct

**Table S4:** Identification of phenolics compounds in roots and shoots of flax seedlings by UPLC- HDMS<sup>E</sup>.

| N  | Family                            | Compounds                         | Part used     | RT (min) | CCS (Å²) | [M-H] <sup>-</sup> precursor ion (m/z) | MS <sup>E</sup> fragment ions (m/z) | m/z (Expected) | Error (mDa) | Error (ppm) | Elemental Composition                               | References |
|----|-----------------------------------|-----------------------------------|---------------|----------|----------|----------------------------------------|-------------------------------------|----------------|-------------|-------------|-----------------------------------------------------|------------|
| 1  | Cyanogenic glycoside              | Linamarin                         | shoots, roots | 0,54     | 165      | 292,1035                               |                                     | 292,1038       | -0,3        | -1,0        | C <sub>11</sub> H <sub>18</sub> O <sub>8</sub> N*   | [I, II]    |
|    |                                   |                                   |               |          |          |                                        | 246,0979                            | 246,0983       | -0,4        | -1,6        | C <sub>10</sub> H <sub>16</sub> O <sub>6</sub> N    |            |
| 2  | Cyanogenic glycoside              | Lotaustralin                      | shoots, roots | 0,81     | 169      | 306,1189                               |                                     | 306,1194       | -0,5        | -1,6        | C <sub>12</sub> H <sub>20</sub> O <sub>8</sub> N*   | [I, II]    |
|    |                                   |                                   |               |          |          |                                        | 260,1133                            | 260,114        | -0,7        | -2,7        | C <sub>11</sub> H <sub>18</sub> O <sub>6</sub> N    |            |
| 6  | Flavonoids (luteolin derivatives) | <i>Carlinoside isomer</i>         | shoots        | 2,44     | 230      | 579,1362                               |                                     | 579,1362       | 0           | 0,0         | C <sub>26</sub> H <sub>27</sub> O <sub>15</sub>     | [III]      |
|    |                                   |                                   |               |          |          |                                        | 489,1046                            | 489,1038       | 0,8         | 1,6         | C <sub>23</sub> H <sub>21</sub> O <sub>12</sub>     |            |
|    |                                   |                                   |               |          |          |                                        | 459,0942                            | 459,0927       | 1,5         | 3,3         | C <sub>22</sub> H <sub>19</sub> O <sub>11</sub>     |            |
|    |                                   |                                   |               |          |          |                                        | 429,0836                            | 429,0827       | 0,9         | 2,1         | C <sub>21</sub> H <sub>17</sub> O <sub>10</sub>     |            |
|    |                                   |                                   |               |          |          |                                        | 399,0731                            | 399,0722       | 0,9         | 2,3         | C <sub>20</sub> H <sub>15</sub> O <sub>9</sub>      |            |
|    |                                   |                                   |               |          |          |                                        | 369,0619                            | 369,0616       | 0,3         | 0,8         | C <sub>19</sub> H <sub>13</sub> O <sub>8</sub>      |            |
|    |                                   |                                   |               |          |          |                                        | 339,0510                            | 339,051        | 0           | 0,0         | C <sub>18</sub> H <sub>11</sub> O <sub>7</sub>      |            |
| 13 | Flavonoids (apigenin derivatives) | <i>Schaftoside isomer</i>         | shoots        | 2,66     | 231      | 563,1403                               |                                     | 563,1406       | -0,3        | -0,5        | C <sub>26</sub> H <sub>27</sub> O <sub>14</sub>     | [III]      |
|    |                                   |                                   |               |          |          |                                        | 503,1206                            | 503,1195       | 1,1         | 2,2         | C <sub>24</sub> H <sub>23</sub> O <sub>12</sub>     |            |
|    |                                   |                                   |               |          |          |                                        | 443,0982                            | 443,0984       | -0,2        | -0,5        | C <sub>22</sub> H <sub>19</sub> O <sub>10</sub>     |            |
|    |                                   |                                   |               |          |          |                                        | 383,0767                            | 383,0772       | -0,5        | -1,3        | C <sub>20</sub> H <sub>15</sub> O <sub>8</sub>      |            |
| 16 | Hydroxycinnamic acids             | 3-O-caffeoylquinic acid           | shoots        | 1,03     | 174      | 375,0697                               |                                     | 375,0692       | 0,5         | 1,3         | C <sub>16</sub> H <sub>16</sub> O <sub>9</sub> Na** | [IV, V]    |
|    |                                   |                                   |               |          |          |                                        | 353,0880                            | 353,0878       | 0,2         | 0,6         | C <sub>16</sub> H <sub>17</sub> O <sub>9</sub>      |            |
|    |                                   |                                   |               |          |          |                                        | 191,0558                            | 191,0561       | -0,3        | -1,6        | C <sub>7</sub> H <sub>11</sub> O <sub>6</sub>       |            |
|    |                                   |                                   |               |          |          |                                        | 135,0448                            | 135,0452       | -0,4        | -3,0        | C <sub>8</sub> H <sub>7</sub> O <sub>2</sub>        |            |
|    |                                   |                                   |               |          |          |                                        | 134,0366                            | 134,0373       | -0,7        | -5,2        | C <sub>8</sub> H <sub>6</sub> O <sub>2</sub>        |            |
| 17 | Hydroxycinnamic acids             | <i>Caffeoylquinic acid isomer</i> | shoots        | 1,6      | 177      | 375,0697                               |                                     | 375,0692       | 0,4         | 1,1         | C <sub>16</sub> H <sub>16</sub> O <sub>9</sub> Na** | [IV, V]    |
|    |                                   |                                   |               |          |          |                                        | 353,0881                            | 353,0878       | 0,3         | 0,8         | C <sub>16</sub> H <sub>17</sub> O <sub>9</sub>      |            |
|    |                                   |                                   |               |          |          |                                        | 191,0561                            | 191,0561       | 0           | 0,0         | C <sub>7</sub> H <sub>11</sub> O <sub>6</sub>       |            |

|    |                       |                                        |        |      |     |          |          |          |      |      |                                                      |                        |
|----|-----------------------|----------------------------------------|--------|------|-----|----------|----------|----------|------|------|------------------------------------------------------|------------------------|
| 18 | Hydroxycinnamic acids | <i>Caffeoylquinic acid hexoside</i>    | shoots | 0,62 | 231 | 537,1230 |          | 537,122  | 1    | 1,9  | C <sub>22</sub> H <sub>26</sub> O <sub>14</sub> Na** | [IV, V]                |
|    |                       |                                        |        |      |     |          | 515,1403 | 515,1403 | 0    | 0,0  | C <sub>22</sub> H <sub>27</sub> O <sub>14</sub>      |                        |
| 19 | Hydroxycinnamic acids | Caftaric acid                          | roots  | 0,68 | 172 | 333,0224 |          | 333,0228 | -0,4 | -1,2 | C <sub>13</sub> H <sub>10</sub> O <sub>9</sub> Na**  | [V]                    |
|    |                       |                                        |        |      |     |          | 311,0404 | 311,0409 | -0,5 | -1,6 | C <sub>13</sub> H <sub>11</sub> O <sub>9</sub>       |                        |
|    |                       |                                        |        |      |     |          | 135,0449 | 135,0452 | -0,3 | -2,2 | C <sub>8</sub> H <sub>7</sub> O <sub>2</sub>         |                        |
|    |                       |                                        |        |      |     |          | 134,0371 | 134,0373 | -0,2 | -1,5 | C <sub>8</sub> H <sub>6</sub> O <sub>2</sub>         |                        |
| 20 | Hydroxycinnamic acids | Icariside F2                           | roots  | 1,78 | 204 | 447,1512 |          | 447,1508 | 0,4  | 0,9  | C <sub>19</sub> H <sub>27</sub> O <sub>12</sub> *    | [VI, VII, VIII]        |
|    |                       |                                        |        |      |     |          | 401,1458 | 401,1453 | 0,5  | 1,2  | C <sub>18</sub> H <sub>25</sub> O <sub>10</sub>      |                        |
| 21 | Hydroxycinnamic acids | Chicoric acid                          | roots  | 2,77 | 204 | 495,0550 |          | 495,054  | 1    | 2,0  | C <sub>22</sub> H <sub>16</sub> O <sub>12</sub> Na** | [V]                    |
|    |                       |                                        |        |      |     |          | 473,0734 | 473,0725 | 0,9  | 1,9  | C <sub>22</sub> H <sub>17</sub> O <sub>12</sub>      |                        |
|    |                       |                                        |        |      |     |          | 311,0408 | 311,0403 | 0,5  | 1,6  | C <sub>13</sub> H <sub>11</sub> O <sub>9</sub>       |                        |
|    |                       |                                        |        |      |     |          | 293,0303 | 293,0297 | 0,6  | 2,0  | C <sub>13</sub> H <sub>9</sub> O <sub>8</sub>        |                        |
|    |                       |                                        |        |      |     |          | 219,0297 | 219,0299 | -0,2 | -0,9 | C <sub>11</sub> H <sub>7</sub> O <sub>5</sub>        |                        |
|    |                       |                                        |        |      |     |          | 179,0346 | 179,035  | -0,4 | -2,2 | C <sub>9</sub> H <sub>7</sub> O <sub>4</sub>         |                        |
|    |                       |                                        |        |      |     |          | 149,0089 | 149,0092 | -0,3 | -2,0 | C <sub>4</sub> H <sub>5</sub> O <sub>6</sub>         |                        |
|    |                       |                                        |        |      |     |          | 135,0446 | 135,0452 | -0,6 | -4,4 | C <sub>8</sub> H <sub>7</sub> O <sub>2</sub>         |                        |
| 26 | Lignans               | (-)-Olivil 4'-O-beta-D-glucopyranoside | roots  | 2,57 | 231 | 583,2041 |          | 583,2032 | 0,9  | 1,5  | C <sub>27</sub> H <sub>35</sub> O <sub>14</sub> *    | [IX, X, XI, XII, XIII] |
|    |                       |                                        |        |      |     |          | 537,1988 | 537,1978 | 1    | 1,9  | C <sub>26</sub> H <sub>33</sub> O <sub>12</sub>      |                        |
|    |                       |                                        |        |      |     |          | 375,1456 | 375,1449 | 0,7  | 1,9  | C <sub>20</sub> H <sub>23</sub> O <sub>7</sub>       |                        |
| 27 | Lignans               | <i>Olivil isomer 1</i>                 | roots  | 1,64 | 238 | 583,2040 |          | 583,2032 | 0,8  | 1,4  | C <sub>27</sub> H <sub>35</sub> O <sub>14</sub>      | [IX, X, XI, XII, XIII] |
|    |                       |                                        |        |      |     |          | 537,1960 | 537,1978 | -1,8 | -3,4 | C <sub>26</sub> H <sub>33</sub> O <sub>12</sub>      |                        |
| 28 | Lignans               | <i>Olivil isomer 2</i>                 | roots  | 2,63 | 223 | 583,2032 |          | 583,2032 | 0    | 0,0  | C <sub>27</sub> H <sub>35</sub> O <sub>14</sub>      | [IX, X, XI, XII, XIII] |
|    |                       |                                        |        |      |     |          | 537,1972 | 537,1978 | -0,6 | -1,1 | C <sub>26</sub> H <sub>33</sub> O <sub>12</sub>      |                        |
| 29 | Lignans               | <i>Olivil isomer 3</i>                 | roots  | 2,9  | 222 | 583,2029 |          | 583,2032 | -0,3 | -0,5 | C <sub>27</sub> H <sub>35</sub> O <sub>14</sub>      | [IX, X, XI, XII, XIII] |
|    |                       |                                        |        |      |     |          | 537,1966 | 537,1978 | -1,2 | -2,2 | C <sub>26</sub> H <sub>33</sub> O <sub>12</sub>      |                        |



|    |         |                        |       |      |     |          |          |      |      |                                                 |                        |
|----|---------|------------------------|-------|------|-----|----------|----------|------|------|-------------------------------------------------|------------------------|
| 30 | Lignans | <i>Olivil isomer 4</i> | roots | 3,29 | 237 | 583,2019 | 583,2032 | -1,3 | -2,2 | C <sub>27</sub> H <sub>35</sub> O <sub>14</sub> | [IX, X, XI, XII, XIII] |
| 31 | Lignans | SMG                    | roots | 4,35 | 225 | 523,2185 | 523,2185 | 0    | 0,0  | C <sub>26</sub> H <sub>35</sub> O <sub>11</sub> | [XIV, XV]              |
|    |         |                        |       |      | 217 | 523,2189 | 523,2185 | 0,4  | 0,8  | C <sub>26</sub> H <sub>35</sub> O <sub>11</sub> |                        |
| 32 | Lignans | <i>SMG isomer</i>      | roots | 3,9  |     | 361,1651 | 361,1657 | -0,6 | -1,7 | C <sub>20</sub> H <sub>25</sub> O <sub>6</sub>  | [XIV, XV]              |
|    |         |                        |       |      |     | 346,1410 | 346,1422 | -1,2 | -3,5 | C <sub>19</sub> H <sub>22</sub> O <sub>6</sub>  |                        |

\* [M+HCOO]- adduct

\*\* [M-2H+Na]- adduct

## References

1. Sulyok, M.; Beed, F.; Boni, S.; Abass, A.; Mukunzi, A.; Krska, R. Quantitation of multiple mycotoxins and cyanogenic glucosides in cassava samples from Tanzania and Rwanda by an LC-MS/MS-based multi-toxin method. *Food Additives & Contaminants: Part A*. **2014**, *32*(4), 488-502, doi.org/10.1080/19440049.2014.975752.
2. Dalisay, D.; Kim, K.; Lee, C.; Yang, H.; Rübel, O.; Bowen, B.; Davin, L.; Lewis, N. Dirigent Protein-Mediated Lignan and Cyanogenic Glucoside Formation in Flax Seed: Integrated Omics and MALDI Mass Spectrometry Imaging. *Journal of Natural Products*. **2015**, *78*, 1231-1242, doi: 10.1021/acs.jnatprod.5b00023.
3. Tchoumtchoua, J.; Mathiron, D.; Pontarin, N.; Gagneul, D.; van Bohemen, A.-I.; Ootogo N'ang, E.; Mesnard, F.; Petit, E.; Fontaine, J.-X.; Molinié, R.; et al. Phenolic Profiling of Flax Highlights Contrasting Patterns in Winter and Spring Varieties. *Molecules* **2019**, *24*, 4303:1-4303 :14, doi:10.3390/molecules24234303.
4. Bujor, O. Extraction, identification and antioxidant activity of the phenolic secondary metabolites isolated from the leaves, stems and fruits of two shrubs of the Ericaceae family. *PhD Thesis*. **2016**.
5. Chen, C.; Chen, S.; Liu, C.; Wu, D.; Kuo, C.; Lin, C.; Chou, H.; Wang, Y.; Tsai, Y.; Lai, M.; Chung, C. Invasion and Colonization Pattern of *Fusarium fujikuroi* in Rice. *Fungal Biology and Genetics*. **2020**, *110*, 1934-1945, doi: 10.1094/PHYTO-03-20-0068-R.
6. Wang, M.; Li, J.; Rangarajan, M.; Shao, Y.; LaVoie, E.; Huang, T.; Ho, C. Antioxidative Phenolic Compounds from Sage (*Salvia officinalis*). *Journal of Agricultural and Food Chemistry*. **1998**, *46*, 4869-4873, doi: 10.1021/jf980614b.
7. Xiao, S.; Hao, C.; Ai, N.; Luo, K.; Wen, X.; Wang, S.; Fan, X. Deciphering the differentiations of traditional Chinese medicine analogous formulae by parallel liquid chromatography-mass spectrometry coupled with microplate-based assays. *Analytical Methods*. **2014**, *6*, 9283, doi: 10.1039/c4ay01972e.
8. Bai, M.; Shi, W.; Tian, J.; Lei, M.; Kim, Y.; Sun, Y.; Kim, J.; Gao, J. Soluble epoxide hydrolase inhibitory and anti-inflammatory components from the leaves of *Eucommia ulmoides* Oliver (Duzhong). *Journal of Agricultural and Food Chemistry*. **2015**, *63*, 2198-2205, doi: 10.1021/acs.jafc.5b00055.
9. Schumacher, B.; Scholle, S.; Hölzl, J.; Khudeir, N.; Hess, S.; Müller, C. Lignans Isolated from Valerian: Identification and Characterization of a New Olivil Derivative with Partial Agonistic Activity at A1 Adenosine Receptors. *Journal of Natural Products*. **2002**, *65*, 1479-1485, doi: 10.1021/np010464q.
10. Kanchanapoom, T.; Noiarsa, P.; Otsuka, H.; Ruchirawat, S. Lignan, phenolic and iridoid glycosides from *Stereospermum cylindricum*. *Phytochemistry*. **2006**, *67*, 516-520, doi: 10.1016/j.phytochem.2005.10.009.
11. Deyama, T.; Ikawa, T.; Kitagawa, S.; Nishibe, S. The Constituents of *Eucomia ulmoides* OLIV. III. Isolation and Structure of a New Lignan Glycoside. *Chemical and Pharmaceutical Bulletin*. **1986**, *34*(2), 523-527, doi: 10.1248/cpb.34.523.
12. Kadowaki, E.; Yoshida, Y.; Nitoda, T.; Baba, N.; Nakajima, S. (-)-Olivil and (+)-1-Acetoxypinoresinol from the Olive Tree (*Olea europaea* LINNE; Oleaceae) as Feeding Stimulants of the Olive Weevil (*Dyscerus perforates*). *Bioscience, Biotechnology, and Biochemistry*. **2003**, *67*(2), 415-419, doi: 10.1271/bbb.67.415.
13. Shi, S.; Peng, M.; Zhang, Y.; Peng, S. Combination of preparative HPLC and HSCCC methods to separate phosphodiesterase inhibitors from *Eucommia ulmoides* bark guided by ultrafiltration-based ligand screening. *Analytical and Bioanalytical Chemistry*. **2013**, *405*:4213-4223, doi: 10.1007/s00216-013-6806-4.
14. Ghose, K.; Selvaraj, K.; McCallum, J.; Kirby, C.; Sweeney-Nixon, M.; Cloutier, S.; Deyholos, M.; Datla, R.; Fofana, B. Identification and functional characterization of a flax UDP-glycosyltransferase glucosylating secoisolariciresinol (SECO) into secoisolariciresinol monoglucoside (SMG) and diglucoside (SDG). *BMC Plant Biology*. **2014**, *14*:82, doi: 10.1186/1471-2229-14-82.
15. Huis, R.; Morreel, K.; Fliniaux, O.; Lucau-Danila, A.; Fénart, S.; Grec, S.; Neutelings, G.; Chabbert, B.; Mesnard, F.; Boerjan, W.; Hawkins, S. Natural Hypolignification Is Associated with Extensive Oligolignol Accumulation in Flax Stems. *Plant Physiology*. **2012**, *158*, 1893-1915, doi: 10.1104/pp.111.192328.
